# Supplementary material for: Global Greenhouse Gas Reconciliation 2022
Source: Copernicus journal article supplement (doi:10.5194/essd-2024-103), 2024-07-05
Supplement: Supplementary file [file essd-2024-103-AC1-supplement.pdf]

Reply to RC1: ['Comment on essd-2024-103'](#), Christian DiMaria, 29 Jul 2024

Review for ESSD 2024 - 103

Overview:

In this study, the authors compare an ensemble of inversion-based estimates of terrestrial greenhouse gas fluxes including CO<sub>2</sub>, CH<sub>4</sub>, and N<sub>2</sub>O with National Greenhouse Gas Inventory (NGHGI) estimates. The gridded inversion-based flux estimates are processed using an updated methodology so that they can be directly compared with country-(or group-of-country)-scale sector-specific flux estimates from the NGHGIs. For CO<sub>2</sub>, the authors use an updated land mask to filter out inversion-based fluxes from unmanaged lands (i.e., intact forests) and also account for lateral transport of carbon via rivers, crop trade, and wood trade, allowing for direct comparison of the inversion and NGHGI non-fossil CO<sub>2</sub> fluxes. For CH<sub>4</sub>, the inversion-based fluxes were partitioned into three "super-sectors" (agricultural and waste, fossil fuels, and biofuel + biomass burning excluding wildfires) for comparison with the NGHGIs. For N<sub>2</sub>O, anthropogenic fluxes were obtained from the inversions by subtracting natural fluxes from lakes and rivers as well as from wildfires. For each greenhouse gas, the authors compare the ensemble of processed inversion-based flux estimates with NGHGIs in a variety of countries, while also comparing to the previous study of Deng et al (2022) to show the impact of the new datasets and updated land mask on the inversion ensembles. Notable discrepancies between the inversion ensembles and the NGHGIs are discussed for each gas. The accompanying dataset is accessible at the given identifier, is easy to use, and contains all necessary information to perform statistical tests and reproduce the key figures in the manuscript. In particular, there is nothing to indicate that the data are erroneous, and the format of the CSV files makes it very easy to perform statistical analyses on them.

I think the submitted manuscript is appropriate to support the publication of this data set. The data and methods presented are a useful and valuable update to the work presented in Deng et al (2022). The differences in methodology and data availability between this work and Deng et al (2022) are clearly explained, and their impacts on the results are illustrated throughout the manuscript by comparing the updated inversion ensembles with those of Deng et al (2022). Limitations and uncertainties associated with the methodology are also discussed in appropriate detail. The overall structure of the manuscript is sensible and easy to follow. Overall, I think this dataset and the accompanying manuscript will be useful and interesting to anyone working on global greenhouse gas emission studies in the future. I have a few general comments and suggestions for the authors to consider below, as well as a list of specific comments and technical corrections at the end of this document.

Thank you for the positive and very constructive comments. Please find below our replies.

General comments:

The manuscript may benefit from a slightly longer discussion of the impact of the prior fluxes on the CH<sub>4</sub> inversion results in Section 6.4. The authors demonstrate that CH<sub>4</sub> emissions are sensitive to the prior in several regions in Figure 11 and SI Fig 2, and they mention this earlier in the text as well (Line 175) when they discuss the work of Tibrewal et al (2024), but I think it

would helpful to expand this discussion since the impact on the results was quite pronounced in a few regions.

We appreciate the reviewer's comment. We have emphasized that the differences in prior fluxes introduce additional uncertainties into the inversion results. These discrepancies arise from the varying methodologies and data sources used in the inventories used as priors. Specifically, the two priors included in this study, EDGAR and GAINS, have distinct foundations; EDGAR is based on IPCC emission factors and IEA energy statistics, while GAINS employs an independent methodology. As a result, the estimates derived from these two inventories inherently differ.

In response to your suggestion, we have expanded the discussion in Section 6.4 to better articulate the impact of these prior fluxes on the CH<sub>4</sub> inversion results. Additionally, we have moved Figure S2 to the main text, now labeled as Figure 12, to provide a clearer visual representation of the sensitivity of CH<sub>4</sub> emissions to these prior fluxes in various regions.

**Line 881-888:**

*Such discrepancies may arise from differences in inventory methodologies and the resulting estimations. As shown in Supplementary Figure S1 in Tibrewal et al. (2024), similar discrepancies were found between the two inventories in these countries, which reports a higher estimation from GAINS in RUS and USA compared to EDGAR during 2011-2020, and a lower estimation in IRN. As noted in Tibrewal et al. (2024), EDGAR is based on various versions of National Inventory Reports (NIR) that utilize different combinations of emission factors from the IPCC, while GAINS employs an independent estimation approach. This highlights the critical role of prior data selection in determining the accuracy of CH<sub>4</sub> emission estimates.*

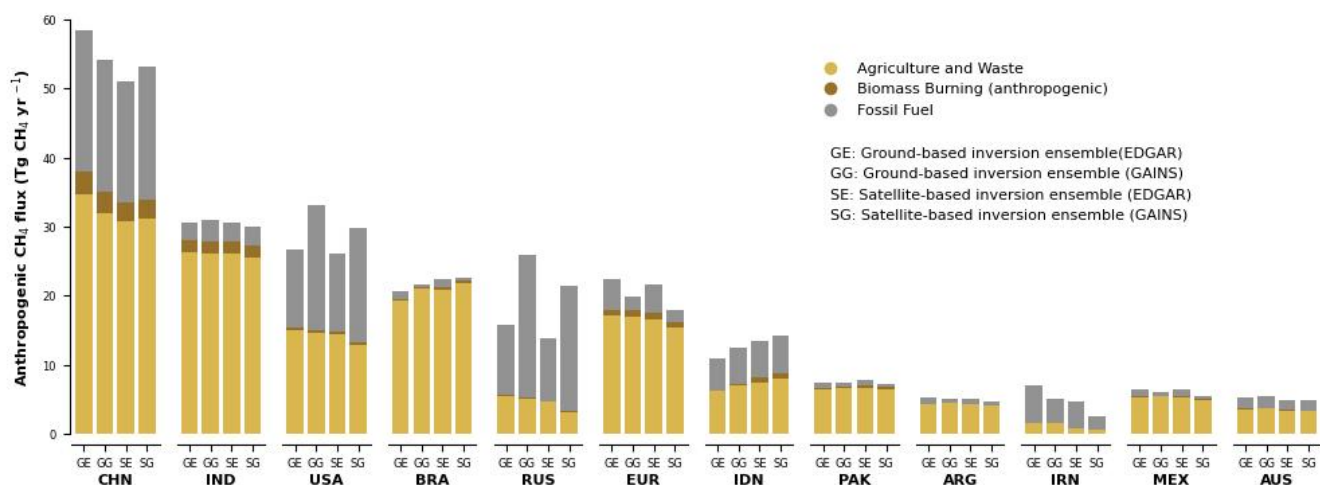

**Fig 12. Annual average of anthropogenic CH<sub>4</sub> emissions from in-situ and satellite inversions based on two different priors during the period of 2010-2020. GE and SE denote the anthropogenic CH<sub>4</sub> flux from the in-situ and satellite inversion ensembles based on**

*EDGARv6.0 as the prior, while GG and SG represent the in-situ and satellite CH<sub>4</sub> inversions based on GAINS as the prior.*

I also think the comparison of the N<sub>2</sub>O results between this study and Deng et al (2022) described in Section 6.5 and Figure 12 was too brief, given how much time was spent earlier in the manuscript describing the N<sub>2</sub>O methodology and results. In particular, there is a good discussion of uncertainties in anthropogenic N<sub>2</sub>O emission estimates in Section 5 where the authors explain possible reasons for the discrepancies between inversions and NGHGs. For the sake of future users of this dataset and existing users of the Deng et al (2022) dataset, I think it would be helpful if the authors could connect some of these (or other) sources of uncertainty with the discrepancies we see in Figure 12.

Thanks for your comment. We extend the discussion in Section 6,5:

**Line 910-923:** *The updated N<sub>2</sub>O inversion results show systematically higher anthropogenic emissions than the previous N<sub>2</sub>O inversion results (Deng et al., 2022), resulting in larger discrepancies between N<sub>2</sub>O inversion results and NGHGs in most countries, as illustrated in Figure 13. Countries such as Brazil (BRA), Democratic Republic of the Congo (COD), Indonesia (IDN), Colombia (COL), Sudan (SDN), Australia (AUS), and Venezuela (VEN) exhibit significant differences. These discrepancies may be attributed to the use of lower IPCC default emission factors in the national inventories of these tropical countries, leading to lower NGHGI results. The IPCC default emission factors are derived from measurements primarily conducted in temperate regions of the Northern Hemisphere (e.g., Europe and the USA), which explains the better alignment of inversion results with inventories in those regions. Notably, in the case of the USA, the median of the updated N<sub>2</sub>O inversion results is very close to the NGHGs. The median of the N<sub>2</sub>O inversion results from Deng et al. (2022) was 42% lower than the NGHGs between 2005 and 2015, whereas the median of the updated inversion models is only 4% lower. This demonstrates improved consistency in the updated inversion system results for the USA. Additionally, in countries such as India (IND), Indonesia (IDN), Colombia (COL), Canada (CAN), and Venezuela (VEN), our N<sub>2</sub>O inversion results show a larger distribution compared to the previous study. This indicates that the new N<sub>2</sub>O inversion ensemble (n=4) has less consistency in these countries compared to the previous ensemble (n=3).*

The accompanying dataset may benefit from some additional metadata, specifically for flux units and full "super-sector" names. This information is all available in the manuscript, but it would be more convenient for future users of these files if all the necessary information was self-contained in the data files. If this is not practical, perhaps include a README file with additional metadata on the Zenodo archive.

Thank you for your insightful suggestion. We agree that including additional metadata, such as flux units and full "super-sector" names, would enhance the usability of the dataset. We've added a README file with the necessary metadata and will make it available in the Zenodo archive (<https://doi.org/10.5281/zenodo.13887128>).

The presentation quality of the manuscript and dataset is generally good. The methods section in particular was very thorough. However, some of the descriptions of results in Sections 3, 4.1, and 4.2 are a bit too long in my opinion. Figures 3, 4, 5, and 6 are well-made and easy to understand, so some of the descriptions of these results could probably be made a bit more concise. Shortening these descriptions would also free up some space to expand on the discussion in Sections 6.4 and 6.5, as mentioned above. Other than a few typos or small grammatical issues, the language was consistent and precise. Tables were informative and easy to read, and Figures were well-made and clear (except colour issue in Figure 3, see "Minor comments").

We appreciate your feedback regarding the length of the descriptions for each selected country. Our intention was to fully showcase and discuss the specific situations and differences among these countries. In response to your comments, we have balanced the manuscript by condensing the sections as suggested while also expanding Sections 6.4 and 6.5 for a more comprehensive discussion. Additionally, we have corrected any spelling errors, grammatical issues, and the color problem in Figure 3.

I found it difficult to keep track of all the abbreviations used throughout the paper. There are dozens of abbreviations in the text (including subscripts for flux terms, countries or groupings of countries, models used in different inversions, and different kinds of reports for the NGHGs), and I often found myself flipping back to earlier pages to remind myself what some of them meant. I appreciated that country abbreviations were always re-stated in the figure captions; perhaps periodically re-stating some of the other definitions would be useful as well.

Thanks for the suggestion. We re-state the country abbreviations when they are first mentioned in every Section. And we also add a glossary of country abbreviations in **Table S1**:

***Table S1. Glossary of country abbreviations.***

| <b>Gas</b>            | <b>Super Sector</b>  | <b>Country List</b>                                                                                                                                                                                                                                                 |
|-----------------------|----------------------|---------------------------------------------------------------------------------------------------------------------------------------------------------------------------------------------------------------------------------------------------------------------|
| <i>CO<sub>2</sub></i> | <i>Net Land Flux</i> | <i>AUS: Australia,<br/>BRA: Brazil,<br/>CAN: Canada,<br/>CHN: China,<br/>COD: Democratic Republic of the Congo,<br/>EUR: European Union,<br/>IND: India,<br/>KAZ: Kazakhstan,<br/>MNG: Mongolia,<br/>RUS: Russia,<br/>USA: United States,<br/>ZAF: South Africa</i> |
| <i>CH<sub>4</sub></i> | <i>Anthropogenic</i> | <i>ARG: Argentina,<br/>AUS: Australia,<br/>BRA: Brazil,</i>                                                                                                                                                                                                         |

|                                |                                                                                                                                                                                                                                                                                                                                                                                                                                                   |
|--------------------------------|---------------------------------------------------------------------------------------------------------------------------------------------------------------------------------------------------------------------------------------------------------------------------------------------------------------------------------------------------------------------------------------------------------------------------------------------------|
|                                | <p><b>CHN:</b> China,<br/> <b>EUR:</b> European Union,<br/> <b>IDN:</b> Indonesia,<br/> <b>IND:</b> India,<br/> <b>IRN:</b> Iran,<br/> <b>MEX:</b> Mexico,<br/> <b>PAK:</b> Pakistan,<br/> <b>RUS:</b> Russia,<br/> <b>USA:</b> United States</p>                                                                                                                                                                                                 |
| Fossil                         | <p><b>CHN:</b> China,<br/> <b>EUR:</b> European Union,<br/> <b>GULF:</b> Gulf countries (Saudi Arabia + Oman + United Arab Emirates + Kuwait + Bahrain + Iraq + Qatar),<br/> <b>IDN:</b> Indonesia,<br/> <b>IND:</b> India,<br/> <b>IRN:</b> Iran,<br/> <b>KAZ&amp;TKM:</b> Kazakhstan + Turkmenistan,<br/> <b>MEX:</b> Mexico,<br/> <b>NGA:</b> Nigeria,<br/> <b>RUS:</b> Russia,<br/> <b>USA:</b> United States,<br/> <b>VEN:</b> Venezuela</p> |
| Agriculture and Waste          | <p><b>ARG:</b> Argentina,<br/> <b>BGD:</b> Bangladesh,<br/> <b>BRA:</b> Brazil,<br/> <b>CHN:</b> China,<br/> <b>EUR:</b> European Union,<br/> <b>IDN:</b> Indonesia,<br/> <b>IND:</b> India,<br/> <b>MEX:</b> Mexico,<br/> <b>PAK:</b> Pakistan,<br/> <b>RUS:</b> Russia,<br/> <b>THA:</b> Thailand,<br/> <b>USA:</b> United States</p>                                                                                                           |
| N <sub>2</sub> O Anthropogenic | <p><b>AUS:</b> Australia,<br/> <b>BRA:</b> Brazil,<br/> <b>CHN:</b> China,<br/> <b>COD:</b> Democratic Republic of the Congo,<br/> <b>COL:</b> Columbia,<br/> <b>EUR:</b> European Union,<br/> <b>IDN:</b> Indonesia,<br/> <b>IND:</b> India,<br/> <b>MEX:</b> Mexico,<br/> <b>SDN:</b> Sudan,<br/> <b>USA:</b> United States,<br/> <b>VEN:</b> Venezuela</p>                                                                                     |

---

Specific comments:

Lines 57 – 58:

This sentence is unclear to me. The equivalent sentence on Zenodo makes more sense: "Much denser sampling of atmospheric CO<sub>2</sub> and CH<sub>4</sub> concentrations by different satellites, coordinated into a global constellation, is expected in the coming years."

Thank you for the comment. We revised the sentence:

**Line 57-58:** *Much denser sampling of atmospheric CO<sub>2</sub> and CH<sub>4</sub> concentrations by different satellites, coordinated into a global constellation, is expected in the coming years.*

Lines 107 – 113:

The formatting here is a bit awkward to read, specifically because of the additional semicolons in points 2 and 3. Maybe list these as 6 questions instead of 4, or find a way to rephrase questions 2 and 3.

Thank you for your suggestion. We have revised the four questions into six for improved clarification:

**Line 110-117:** *Based on the newly updated inversion results and inventory, and an improvement in the methodology framework proposed in the previous study (Deng et al., 2022), we specifically address the following questions: 1) how do inversion models compare with NGHGs for the three gases?; 2) what are the plausible reasons for mismatches between inversions and NGHGs?; 3) did the new maps of managed land masks in this study reduce the mismatch between the inversions and NGHGs for CO<sub>2</sub> and N<sub>2</sub>O?; 4) what independent information can be extracted from inversions to evaluate the mean values or the trends of greenhouse gas emissions and removals?; 5) does this information exhibit a good agreement with NGHGs?; and 6) how do satellite-retrieval driven inversion models differ from the surface in-situ and flask sampling driven inversion model results?*

Table 1:

Could you add a column to this table specifying which transport model is used by each CO<sub>2</sub> inversion system? The format of Table 2 and Table 3 is a bit different and the inversion names seem to include more information about the transport models used (e.g., TM5-CAMS, GEOS-Chem, etc.).

Thank you for your suggestion. We have added a column in Table 1 to specify the transport model used by each CO<sub>2</sub> inversion system.

**Table 1:**

| <b>Inversion System</b>                                                                      | <b>Version</b> | <b>Period</b> | <b>Observation</b>                                                                                                                           | <b>Transport Model</b> |
|----------------------------------------------------------------------------------------------|----------------|---------------|----------------------------------------------------------------------------------------------------------------------------------------------|------------------------|
| CarbonTracker Europe (CTE):<br>CTE2022_SiB4 (van der Laan-Luijkx et al., 2017)               | v2022          | 2001-2021     | Ground-based<br>Obspack GLOBALVIEW<br>plus v7.0 and NRT_v7.2                                                                                 | TM5                    |
| Jena Carboscope sEXTocNEET<br>(Rödenbeck et al., 2003)                                       | v2022          | 1960-2021     |                                                                                                                                              | TM3                    |
| Copernicus Atmosphere<br>Monitoring Service (CAMS)<br>(Chevallier et al., 2005)              | v21r1          | 1979-2021     |                                                                                                                                              | LMDZ v6                |
| The University of Edinburgh (UoE)<br>(Feng et al., 2016)                                     | v6.1b          | 2001-2021     |                                                                                                                                              | GEOS-CHEM              |
| the NICAM-based Inverse<br>Simulation for Monitoring CO2<br>(NISMON-CO2) (Niwa et al., 2022) | v2022.1        | 1990-2021     |                                                                                                                                              | NICAN-TM               |
| CMS-Flux (Liu et al., 2021),                                                                 | v2022          | 2010-2021     | Ground-based & ACOS-<br>GOSAT v9r; OCO-2 v10<br>scaled to WMO2019                                                                            | GEOS-CHEM              |
| CAMS-Satellite (Chevallier et al.,<br>2005)                                                  | FT21r2         | 2010-2021     | bias-corrected ACOS<br>GOSAT v9 over land until<br>August 2014 + bias-<br>corrected ACOS OCO-2<br>v10 over land, both<br>rescaled to WMO2019 | LMDZ v6                |
| THU (Kong et al., 2022)                                                                      | v2022          | 2015-2021     | OCO-2 v10r data scaled to<br>WMO2019                                                                                                         | GEOS-CHEM              |
| GONGGA (Jin et al., 2023)                                                                    | v2022          | 2015-2021     | OCO-2 v10r data scaled to<br>WMO2019                                                                                                         | GEOS-CHEM              |

Lines 175 – 176:

Missing a reference for GAINS, and this sentence is incomplete.

We've added the reference to GAINS and completed the sentence:

**Line 181-183:** *During the production of the inversion simulations, GAINS inventory (Höglund-Isaksson, 2020) was proposed to use another prior for fossil fuel sources instead of using EDGAR v6.*

Lines 207 – 209:

Is it reasonable to consider everything except intact forests as "managed land"? What about other natural landcover types such as arctic tundra or grasslands (outside of Russia, where you assumed they were all managed)? Would excluding these other types of landcover from the Net Ecosystem Exchange CO<sub>2</sub> Flux make a significant difference in your comparison between the inversions and NGHGI estimates?

Thanks for the comment. The NGHGIs encompass all managed land types, including forest land, cropland, grassland, wetlands, settlements, and other areas and transitions of land use between them. While using intact forests as a mask for unmanaged land does overlook other natural land cover types, such as arctic tundra and grasslands, it is important to note, as Grassi et al. (2021) indicate, that the majority of CO<sub>2</sub> fluxes in NGHGIs are attributed to forests land (Paragraph 3 in Section 'Country data submitted to UNFCCC'): "In principle, LULUCF includes all land uses (forest land, cropland, grassland, wetlands, settlements and other land). In practice, although almost all Annex I countries report all land uses, many non-Annex I countries report only on forest land and deforestation (that is, forest converted into other land uses). When splitting the net LULUCF flux into the three categories 'forest', 'deforestation' and 'other' (which includes peat decomposition in Indonesia), forest and deforestation represent more than 95% of the sum of absolute fluxes from the three categories in both Annex I and non-Annex I countries (Supplementary Section 2). This does not mean that other fluxes are unimportant—for example, emissions from agricultural organic soils or removals from grasslands may be relevant in some countries—but simply that at the global level their net sum is close to zero in NGHGIs. In Fig. 1b, 'emissions' include fluxes from deforestation and, for Indonesia, peat fires; 'removals' include fluxes from forest land and from 'other'."

We have also acknowledged the limitations of using intact forests as a proxy for unmanaged land in our manuscript. Specifically, we state in **Line 225-228**: "*This approach assumes that non-intact forest areas can serve as a reasonably good proxy for managed forests reported in the NGHGIs (Grassi et al., 2021, 2023). It is important to note that this approach is somewhat arbitrary, as highlighted in previous studies (Ogle et al., 2018; Chevallier, 2021; Grassi et al., 2021). However, in the absence of a machine-readable definition of managed plots in many NGHGIs, there is currently no better alternative available.*"

Line 306:

The definition for  $\_$  in Equation 4 is not given until Line 321. Can you move the explanation closer to Equation 4 so that the reader does not have to skip ahead to see what the terms mean?

Thanks, we've added a explanation of  $E_{nat}^{aq}$  and  $E_{ant}^{ni}$  below Equation 4.



**Line 322-323:**

$$E_{ant}^{inv} = E_{ML}^{inv} - E_{nat}^{aq} - E_{wildfires}^{GFED} \Leftrightarrow E_{ant}^{ni} \quad (4)$$

Here, the natural N<sub>2</sub>O sources include natural emissions from freshwater systems ( $E_{nat}^{aq}$ ) and natural emissions from wildfires ( $E_{ant}^{ni}$ ).

**Lines 352 – 357:**

This explanation of how you compared the Net Land CO<sub>2</sub> Flux is clear and reasonable, but it would be helpful if you could mention this earlier. In Equation 1 and Line 231 you explain that you are comparing the adjusted inversion NEE flux with the anthropogenic NGHGI fluxes, but it's a bit ambiguous because the adjusted inversion NEE flux does not include fossil CO<sub>2</sub> whereas the anthropogenic NGHGI flux does. So it would be helpful to emphasize earlier in the text that the comparison in Equation 1 will actually be done for only the non-fossil component of the NGHGI fluxes.

Thank you for the suggestion. We revised the corresponding sentences to clarify the comparison is actually done for only the non-fossil component of CO<sub>2</sub> flux.

**Line 230-240:** *In addition to the extraction of fossil CO<sub>2</sub> flux and managed land CO<sub>2</sub> flux, there are CO<sub>2</sub> fluxes that are part of  $F_{ML}^{inv NEE}$  but are not counted by NGHGIs. These fluxes are induced by (i) soils to rivers to oceans carbon export ( $F_{ML}^{rivers}$ ) which has an anthropogenic and a natural component (Regnier et al., 2013), and (ii) net anthropogenic export of crop and wood products across each country's boundary ( $F_{ant}^{crop trade}$  and  $F_{ant}^{wood trade}$ ). The magnitudes of these CO<sub>2</sub> fluxes are different between countries, and values from the selected countries are presented in **SI Fig 1**. We assume that NGHGIs include CO<sub>2</sub> losses from fire (wildfire and prescribed fire) and other disturbances (wind, pests) and from domestic harvesting, as recommended by the IPCC reporting guidelines (IPCC, 2006, 2019) (although some countries, such as Canada and Australia exclude some emissions from these disturbances, and the subsequent removals from the same areas (Grassi et al., 2023)). The adjusted inversion NEE that can be compared with inventories,  $F_{adj}^{inv NEE}$ , is given by:*

$$F_{adj}^{inv NEE} = F_{ML}^{inv NEE} - F_{ML}^{rivers} - F_{ant}^{crop trade} - F_{ant}^{wood trade} \Leftrightarrow F_{ant-nf}^{ni} \quad (1)$$

where the sign  $\Leftrightarrow$  means 'compared with',  $F_{ant-nf}^{ni}$  is the non-fossil part of the anthropogenic CO<sub>2</sub> flux from NGHGIs,  $F_{tot}^{rivers}$  is the sum of the natural and anthropogenic CO<sub>2</sub> flux on land from CO<sub>2</sub> fixation by plants that is leached as carbon via soils and channeled to inland waters to be exported to the ocean or to another country.

**Figure 3:**

It is very hard to see the difference between the light green shading (range of in-situ inversions) and dark green shading (range of satellite inversions). Can you adjust the colour scheme? It was easier to see the different shades in the CH<sub>4</sub> and N<sub>2</sub>O figures so I don't think you need to change those ones.

We've adjusted the color scheme in Fig 3.

**Fig 3:**

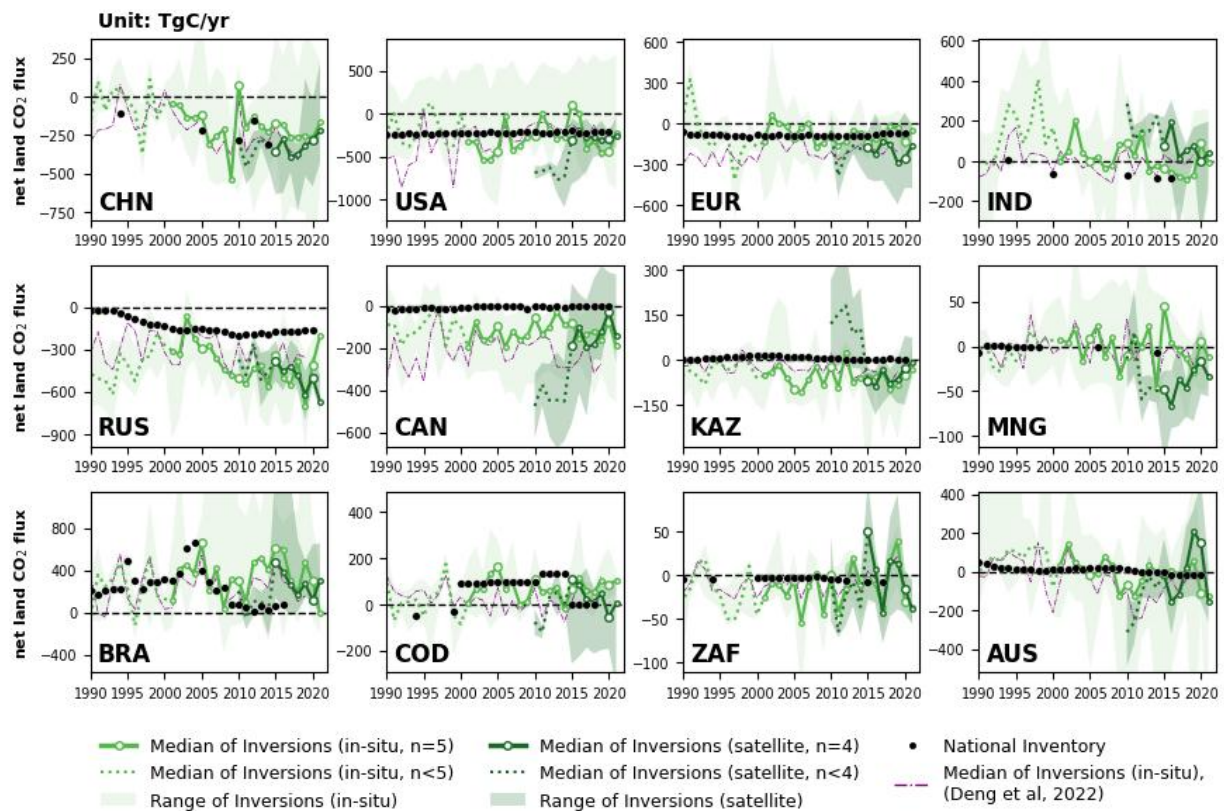

Lines 410 – 420 (Figure 3 caption):

Can you briefly mention the issue with switching from GOSAT to OCO-2 (described in detail on Lines 464 – 470) in this Figure caption? This is crucial for interpreting the time series plots, so it would be helpful to quickly mention that the satellite inversions use only OCO-2 after 2015 in the caption.

Thank you for your suggestion. Based on your input, we have added the following sentence to the **Figure 3 caption**: *Otherwise, when the inversion sets have incomplete inverse models within the time interval (in-situ:  $n < 5$ ; satellite:  $n < 4$ ), their median values are represented as dashed green lines. Besides, before 2015, only GOSAT was available for the 2 of 4 satellite-based inversions, until September 2014 when the OCO-2 record started. The shading area denotes the min-max range of inversions. The red dashed lines denote the median of inversions presented by the previous study (Deng et al., 2022).*

Line 565:

The acronym "IAV" is not defined in the text; is this interannual variability? that the NGHGs reports

Thank you for your suggestion. In the revised manuscript, we have replaced "IAV" with "interannual variability".

Line 641:

Can you give your definition of "ultra-emitter" and explain why they are omitted from NGHGs?

Thanks for the comment. According to Lauvaux et al. (2022), "ultra-emitters" are defined as short-duration leaks from oil and gas facilities (e.g., wells, compressors) with individual emissions exceeding 20 t CH<sub>4</sub> per hour, typically lasting less than one day. Such leaks are often random occurrences and difficult to quantify, which is why most countries do not account for these significant and episodic events in their national inventories. Consequently, they are not reported in NGHGs.

**Line 672-674:** *The ultra-emitters defined by Lauvaux et al. (2022) are namely all short-duration leaks from oil and gas facilities (e.g., wells, compressors) with an individual emission >20 t CH<sub>4</sub>/h, each event lasting generally less than one day. Such leaks are often random occurrences and difficult to quantify, which is why most countries do not account for these significant and episodic events in the national inventories.*

Lines 820 - 841:

Consider moving SI Fig 2 to the main text to help illustrate impact of prior emissions (see also my general comment about expanding section 6.4).

Thank you for your suggestion. We have converted SI Fig 2 into Figure 12 and moved it to Section 6.4. We have also expanded the illustration in Section 6.4.

Technical corrections:

Line 90:

"our framework to process inversion" --> "our framework to process the inversions"

Line 92:

"Atmospheric inversions" --> "Atmospheric inversions"

Line 385:

"Indonesia (IND)" --> "Indonesia (IDN)"

Line 391:

"is a large emitter of oil and gas" --> "is a large producer of oil and gas"

Line 441:

"that the NGHGs reports" --> "than the NGHGs reports"

Lines 443 – 445:

The font here is different from the rest of the text.

Line 446:

Replace semicolon with period.

Line 718:

"which may underestimate emissions n when soil" --> ?? I am not sure if there is a missing word here, or if you should just delete the "n"

Line 768:

"difference" --> "differences"

Line 864:

Delete "In this study,"

Thank you for the comments. We've corrected the technical issues accordingly.
